# Supplementary material for: ACCELERATE: A Patient-Powered Natural History Study Design Enabling Clinical and Therapeutic Discoveries in a Rare Disorder
Source: PubMed Central journal article supplement — Cell Rep Med. 2020 Dec 22;1(9):100158. doi: 10.1016/j.xcrm.2020.100158 (PMC7762771; doi:10.1016/j.xcrm.2020.100158), 2020-12-22
Supplement: mmc1.pdf [file mmc1.pdf]

**Supplemental Information**

**ACCELERATE: A Patient-Powered Natural History  
Study Design Enabling Clinical and  
Therapeutic Discoveries in a Rare Disorder**

**Sheila K. Pierson, Johnson S. Khor, Jasira Ziglar, Amy Liu, Katherine Floess, Erin NaPier, Alexander M. Gorzewski, Mark-Avery Tamakloe, Victoria Powers, Faizaan Akhter, Eric Haljasmaa, Raj Jayanthan, Arthur Rubenstein, Mileva Repasky, Kojo Elenitoba-Johnson, Jason Ruth, Bette Jacobs, Matthew Streetly, Linus Angenendt, Jose Luis Patier, Simone Ferrero, Pier Luigi Zinzani, Louis Terriou, Corey Casper, Elaine Jaffe, Christian Hoffmann, Eric Oksenhendler, Alexander Fosså, Gordan Srkalovic, Amy Chadburn, Thomas S. Uldrick, Megan Lim, Frits van Rhee, and David C. Fajgenbaum**

## Supplemental Information

**Table S1. Data processing metrics in the patient-powered arm, related to Figure 1**

|                                                                                |                    |
|--------------------------------------------------------------------------------|--------------------|
| <b><i>Data requests and receipt</i></b>                                        |                    |
| Days from enrollment to receipt of requested pathology reports                 |                    |
| Median [IQR]                                                                   | 25 [3, 67]         |
| Range                                                                          | 0-466              |
| Number of medical institutions data requested per patient                      |                    |
| Median [IQR]                                                                   | 3.0 [2.0, 4.0]     |
| Range                                                                          | 1, 11              |
| Total medical data requests sent                                               |                    |
| N                                                                              | 1228               |
| Days from receipt of pathology report to receipt of comprehensive medical data |                    |
| Median [IQR]                                                                   | 145 [44, 282]      |
| Range                                                                          | 11, 787            |
| <b><i>Data entry</i></b>                                                       |                    |
| Days from start of data entry until completion of PI review                    |                    |
| Median [IQR]                                                                   | 44 [16.5, 92.0]    |
| Range                                                                          | 1, 485             |
| Medical record length per patient (pages)                                      |                    |
| Median [IQR]                                                                   | 531 [274, 1041]    |
| Range                                                                          | 11, 8450           |
| Pages entered per week per data analyst                                        |                    |
| Median [IQR]                                                                   | 321 [243, 437]     |
| Total aggregate pages received, as of data cut off                             | 216,851            |
| <b><i>CAS review</i></b>                                                       |                    |
| Days from PI review until CAS review                                           |                    |
| Median [IQR]                                                                   | 158 [119.0, 245.0] |
| CAS Grades, N (%)                                                              |                    |
| 1, Other diagnosis                                                             | 42 (28.8)          |
| 2, Insufficient data for diagnosis                                             | 9 (6.2)            |
| 3, Sufficient data: Possible diagnosis                                         | 32 (21.9)          |
| 4, Sufficient data: Probable diagnosis                                         | 51 (34.9)          |
| 5, Sufficient data: Affirmative diagnosis                                      | 12 (8.2)           |

**Table S2. Data collection elements, related to STAR Methods**

| <b>Category</b>                                              | <b>Data Element</b>                                 |
|--------------------------------------------------------------|-----------------------------------------------------|
| <b>Clinical features</b>                                     | Fatigue                                             |
|                                                              | Malaise                                             |
|                                                              | Night sweats                                        |
|                                                              | Fever                                               |
|                                                              | Unintentional weight loss                           |
|                                                              | Tumor pain/ lymph node pain                         |
|                                                              | Dyspnea                                             |
|                                                              | Pruritus                                            |
|                                                              | Fluid retention                                     |
|                                                              | Peripheral neuropathy                               |
|                                                              | Violaceous lymphocytic papules/ cherry hemangiomata |
|                                                              | Skin disorders                                      |
|                                                              | Interstitial lymphocytic pneumonitis                |
|                                                              | Enlarged liver                                      |
|                                                              | Enlarged spleen                                     |
|                                                              | Lymphadenopathy                                     |
|                                                              | Joint pain                                          |
| <b>Lymph node features</b>                                   | Atrophic/ regressed germinal centers                |
|                                                              | Onion skinning                                      |
|                                                              | Follicular dendritic cell prominence                |
|                                                              | Vascular proliferation                              |
|                                                              | Dysplastic follicular dendritic cells               |
|                                                              | Budding germinal centers                            |
|                                                              | Hyperplastic germinal centers                       |
|                                                              | Interfollicular plasmacytosis                       |
|                                                              | Lollipop sign                                       |
|                                                              | Architectural alteration                            |
|                                                              | Expanded mantle zone                                |
|                                                              | EBV-encoded RNA positive staining                   |
|                                                              | HHV-8 positive staining                             |
| <b>Bone marrow features</b>                                  | Atrophic/ regressed germinal centers                |
|                                                              | Myelofibrosis                                       |
|                                                              | Atypical megakaryocytes                             |
|                                                              | Megakaryocyte hyperplasia                           |
|                                                              | Plasmacytosis                                       |
|                                                              | Plasmacytosis clonality                             |
|                                                              | Hemophagocytosis                                    |
|                                                              | Cellularity                                         |
|                                                              | Emperipolesis                                       |
|                                                              | Myeloid to erythroid ratio                          |
| <b>Laboratory tests (ordered by frequency of collection)</b> | Hemoglobin                                          |
|                                                              | Platelets                                           |
|                                                              | White blood cells                                   |
|                                                              | Creatinine                                          |
|                                                              | Blood urea nitrogen                                 |
|                                                              | Absolute neutrophil count                           |
|                                                              | Absolute lymphocyte count                           |
|                                                              | Absolute monocyte counts                            |
| Absolute eosinophil count                                    |                                                     |

|                                                                            |                                                                                                                                                                                                                                                                                                                                                     |
|----------------------------------------------------------------------------|-----------------------------------------------------------------------------------------------------------------------------------------------------------------------------------------------------------------------------------------------------------------------------------------------------------------------------------------------------|
|                                                                            | Albumin<br>Absolute basophil count<br>Alanine aminotransferase<br>Total bilirubin<br>Alkaline phosphatase<br>Aspartate aminotransferase<br>Estimated glomerular filtration rate<br>Lactate dehydrogenase<br>Red blood cell distribution<br>C-reactive protein<br>Calcium<br>(266 additional lab test have been collected with option to add others) |
| <b>Co-morbidities</b>                                                      | All diagnosed comorbid disorders collected                                                                                                                                                                                                                                                                                                          |
| <b>Surgeries</b>                                                           | Lymph node biopsy<br>Autologous peripheral blood stem cell transplant<br>Allogeneic stem cell transplant<br>Plasmapheresis/ plasma exchange<br>Radiation therapy<br>Bone marrow biopsy<br>Splenectomy<br>(40 additional procedures with option to add others)                                                                                       |
| <b>Castleman-treating medications (ordered by frequency of collection)</b> | Prednisone<br>Rituximab<br>Siltuximab<br>Dexamethasone<br>Methylprednisolone<br>Tocilizumab<br>Cyclophosphamide<br>Immunoglobulin human normal<br>Etoposide<br>Prednisolone<br>(52 additional medications with option to add others)                                                                                                                |
| <b>Flares</b>                                                              | Defined as period from symptom start to at least partial response                                                                                                                                                                                                                                                                                   |
| <b>Adverse drug reactions</b>                                              | All adverse drug reactions associated with a Castleman treating product                                                                                                                                                                                                                                                                             |
| <b>Hospitalizations</b>                                                    | All hospitalizations and reason for hospitalization during period from diagnosis to present                                                                                                                                                                                                                                                         |

**Table S3. Best clinical response as assessed by the site physicians (PDA), related to STAR Methods**

| <b>Response</b>     | <b>Definition</b>                                                                                                                                                                     |
|---------------------|---------------------------------------------------------------------------------------------------------------------------------------------------------------------------------------|
| Complete response   | Physician-determined complete improvement in all Castleman disease-associated symptoms and laboratory values after initiation of the regimen.                                         |
| Partial response    | Physician-determined complete improvement in at least 50% of Castleman disease-associated symptoms and laboratory values, but not a complete response after initiation of the regimen |
| Stable disease      | Physician-determined stable symptoms or a response after initiation of the regimen that does not meet the definition for PR or PD                                                     |
| Progressive disease | Physician-determined worsening in at least 50% of Castleman disease-associated symptoms or laboratory values after initiation of the regimen                                          |

**Table S4. Best clinical response as assessed by the ACCELERATE Registry Team (PPA), related to STAR Methods**

| <b>Response</b>     | <b>Definition</b>                                                                                                                    |
|---------------------|--------------------------------------------------------------------------------------------------------------------------------------|
| Complete response   | 100% normalization of all assessed response criteria* after initiation of the regimen                                                |
| Partial response    | At least 50% normalization of all assessed response criteria* after initiation of the regimen, but does not meet a complete response |
| Stable disease      | Does not meet the definition for partial response or progressive disease                                                             |
| Progressive disease | At least 50% worsening in the number of assessed response criteria* after initiation of the regimen                                  |

\*Constitutional symptoms, organomegaly, lymphocytic interstitial pneumonitis, cherry hemangiomas/ violaceous papules, C reactive protein/ estimated sedimentation rate, hemoglobin, platelet count, albumin, creatinine/ estimated glomerular filtration rate, immunoglobulin g/ gammaglobulin
